# Supplementary material for: One-pot cross double-Mannich reaction of acetaldehyde catalyzed by a binaphthyl-based amino sulfonamide
Source: Royal Society of Chemistry journal article supplement (doi:10.1039/c2cc38370e), 2012-12-17

## Supporting Information

### One-pot cross-double Mannich reaction of acetaldehyde catalyzed by a binaphthyl-based amino sulfonamide

Taichi Kano, Ryu Sakamoto, Yukako Yamaguchi, Ken-ichi Itoh and Keiji Maruoka\*

*Department of Chemistry, Graduate School of Science, Kyoto University*

Sakyo, Kyoto 606-8502, Japan

**General Information.** Infrared (IR) spectra were recorded on a Shimadzu IRPrestige-21 spectrometer. <sup>1</sup>H NMR spectra were measured on a JEOL JNM-FX400 (400 MHz) spectrometer. Chemical shifts were reported in ppm from tetramethylsilane and dimethyl sulfoxide-D<sub>6</sub> as an internal standard. Data were reported as follows: chemical shift, integration, multiplicity (s = singlet, d = doublet, t = triplet, q = quintet, m = multiplet, br = broad, and app = apparent), coupling constants (Hz), and assignment. <sup>13</sup>C NMR spectra were recorded on a JEOL JNM-FX400 (100 MHz) spectrometer. Chemical shifts were reported in ppm from the residual solvent as an internal standard. High performance liquid chromatography (HPLC) was performed on Shimadzu 10A instruments using a Daicel CHIRALPAK AD-H 4.6 mm × 25 cm column. The high-resolution mass spectra (HRMS) were performed on Applied Biosystems Mariner 8295 API-TOF workstation. Optical rotations were measured on a JASCO DIP-1000 digital polarimeter. For thin layer chromatography (TLC) analysis throughout this work, Merck precoated TLC plates (silica gel 60 GF<sub>254</sub>, 0.25 mm) were used. The products were purified by flash column chromatography on silica gel 60 (Merck 1.09386.9025, 230-400 mesh).

In experiments requiring dry solvents, tetrahydrofuran (THF) were purchased from Kanto Chemical Co. Inc. as “Dehydrated”. Chloroform (CHCl<sub>3</sub>) was stored over 4Å molecular sieves. Acetaldehyde was distilled and stored under argon atmosphere at -17 °C. The following products are all known: axially chiral amino sulfonamide (*S*)-**1**,<sup>1</sup> ethyl (4-methoxyphenylimino)acetate,<sup>2</sup> *N*-protected imines were prepared according to the literature procedure.<sup>3,4</sup> Other simple chemicals were purchased and used as such.

**di-*tert*-Butyl ((1*S*,3*S*)-2-Formyl-1,3-diphenylpropane-1,3-diyl)dicarbamate (**4**):** To a solution of *N*-Boc-protected imine **2a** (25.7 mg, 0.125 mmol) in acetaldehyde (250 μL) was added a chiral amino

sulfonamide (*S*)-**1** (2.7 mg, 0.00625 mmol) at 0 °C. After stirring for 3 h, the reaction mixture was evaporated and vacuumed. The residue and the additional catalyst (*S*)-**1** (2.7 mg, 0.00625 mmol) were dissolved in CHCl<sub>3</sub> (125 μL). To the mixture was added *N*-Boc-protected imine **2a** (38.6 mg, 0.1875 mmol) in CHCl<sub>3</sub> (125 μL) slowly over the course of 4 h with syringe pump at 0 °C. After stirring for 2 h, the reaction mixture was quenched with saturated NH<sub>4</sub>Cl and extracted with ethyl acetate. The combined organic layer was washed with brine, dried over Na<sub>2</sub>SO<sub>4</sub> and concentrated. The residue was purified by flash column chromatography on silica gel to afford the double-Mannich adduct **4** (75% yield, 99% ee). Spectral data of **4** were in accordance with those previously reported.<sup>5</sup>

The relative and absolute configuration of **4** was determined as follows. The absolute configuration of the first Mannich adduct **3** was determined to be (*S*) based on the literature data.<sup>6,7</sup> The relative stereochemistry of double-Mannich adduct **4** was assigned to be the *anti* configuration by comparison of the NMR spectra with the literature data.<sup>5</sup> Based on these information, the absolute configuration of **4** obtained in the reaction catalyzed by (*S*)-**1** was determined to be (1*S*,3*S*).

**General Procedure for the One-pot Double Mannich Reaction of Two Different Imines Catalyzed by (*S*)-**1** (Table 2):** To a solution of *N*-Boc-protected imine (0.125 mmol) in acetaldehyde (250 μL) was added a chiral amino sulfonamide (*S*)-**1** (2.7 mg, 0.00625 mmol) at 0 °C. After stirring for 3 h, the reaction mixture was evaporated and vacuumed. The residue was dissolved in THF (1.25 mL). To the mixture were added (*S*)-**1** (2.7 mg, 0.00625 mmol) and ethyl (4-methoxyphenylimino)acetate **5** (38.8 mg, 0.1875 mmol) at 0 °C. After stirring for 2 h, the reaction mixture was quenched with saturated NH<sub>4</sub>Cl and extracted with ethyl acetate. The combined organic layer was washed with brine, dried over Na<sub>2</sub>SO<sub>4</sub> and concentrated. The residue was purified by flash column chromatography on silica gel to afford corresponding product.

**Ethyl (2*S*,3*R*,4*S*)-4-((*tert*-Butoxycarbonyl)amino)-3-formyl-2-((4-methoxyphenyl)amino)-4-phenyl-**

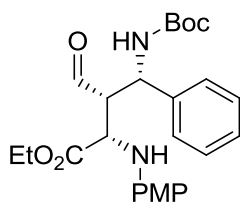

**butanoate (Table 2, entry 1):**  $[\alpha]_D^{24} = 25.3$  (*c* 1.1, CHCl<sub>3</sub>, 99% ee), <sup>1</sup>H NMR (400 MHz, CDCl<sub>3</sub>)  $\delta$  9.77 (1H, s, CHO), 7.44-7.41 (2H, m, ArH), 7.36-7.32 (3H, m, ArH), 6.74-6.70 (2H, m, ArH), 6.62 (1H, d, *J* = 9.9 Hz, NH), 6.47 (2H, d, *J* = 8.9 Hz, ArH), 5.82-5.79 (1H, m, NH), 4.32 (1H, d, *J* = 11.4 Hz, ArCH), 4.05 (2H, q, *J* = 7.1 Hz, CH<sub>2</sub>CH<sub>3</sub>), 3.86-3.78 (1H, m, CHCHO), 3.74 (4H, app s, OCH<sub>3</sub> and CHCO<sub>2</sub>Et), 1.40 (9H, s, C(CH<sub>3</sub>)<sub>3</sub>), 1.14 (3H, t, *J* = 7.1 Hz, CH<sub>2</sub>CH<sub>3</sub>); <sup>13</sup>C NMR (100 MHz, CDCl<sub>3</sub>)  $\delta$  200.9, 172.5, 155.2, 153.9, 140.9, 139.1, 129.1, 127.9, 126.2, 117.4, 80.0, 61.6, 58.5, 56.4, 55.6, 52.5, 28.3, 13.9; IR (neat) 3354, 2978, 1717, 1514, 1244, 1167, 1030, 735 cm<sup>-1</sup>; HRMS (ESI-TOF)

Calcd. for  $C_{25}H_{32}N_2NaO_6$ : 479.2153 ( $[M + Na]^+$ ), Found: 479.2175 ( $[M + Na]^+$ ); HPLC analysis: Daicel Chiralpak AD-H, hexane/*i*-PrOH = 9/1, flow rate = 0.5 mL/min, retention time; 54.5 min (major) and 58.7 min.

**Ethyl (2*S*,3*R*,4*S*)-4-((*tert*-Butoxycarbonyl)amino)-3-formyl-4-(4-methoxyphenyl)-2-((4-methoxyphenyl)amino)butanoate (Table 2, entry 2):**  $[\alpha]_D^{24} = 93.2$  (*c* 0.5,  $CHCl_3$ , 99% ee),  $^1H$  NMR (400 MHz,  $CDCl_3$ )  $\delta$  9.74 (1H, s, CHO), 7.26 (2H, d, *J* = 8.7 Hz, ArH), 6.94 (2H, d, *J* = 8.7 Hz, ArH), 6.73 (2H, d, *J* = 8.9 Hz, ArH), 6.57 (1H, br, NH), 6.52 (2H, d, *J* = 8.9 Hz, ArH), 5.74-5.71 (1H, m, NH), 4.33 (1H, d, *J* = 11.4 Hz, ArCH), 4.06 (2H, q, *J* = 6.9 Hz,  $CH_2CH_3$ ),

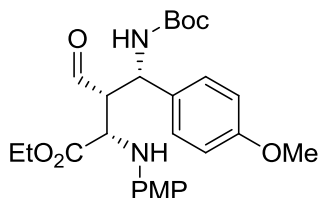

3.89-3.77 (1H, m,  $CHCHO$ ), 3.84 (3H, s,  $OCH_3$ ), 3.74 (3H, s,  $OCH_3$ ), 3.65 (1H, m,  $CHCO_2Et$ ), 1.40 (9H, s,  $C(CH_3)_3$ ), 1.14 (3H, t, *J* = 7.1 Hz,  $CH_2CH_3$ );  $^{13}C$  NMR (100 MHz,  $CDCl_3$ )  $\delta$  201.0, 172.5, 159.2, 155.2, 153.9, 140.9, 131.1, 127.3, 117.4, 114.6, 114.5, 80.0, 61.6, 58.6, 56.4, 55.6, 55.4, 52.1, 28.3, 14.0; IR (neat) 3358, 2930, 1715, 1512, 1246, 1167, 1032, 829  $cm^{-1}$ ; HRMS (ESI-TOF) Calcd. for  $C_{26}H_{34}N_2NaO_7$ : 509.2258 ( $[M + Na]^+$ ), Found: 509.2268 ( $[M + Na]^+$ ); HPLC analysis: Daicel Chiralpak AD-H, hexane/*i*-PrOH = 4/1, flow rate = 0.5 mL/min, retention time; 30.1 min and 39.1 min (major).

**Ethyl (2*S*,3*R*,4*S*)-4-((*tert*-Butoxycarbonyl)amino)-3-formyl-2-((4-methoxyphenyl)amino)-4-(*p*-tolyl)butanoate (Table 2, entry 3):**  $[\alpha]_D^{24} = 39.6$  (*c* 0.88,  $CHCl_3$ , 99% ee),  $^1H$  NMR (400 MHz,  $CDCl_3$ )  $\delta$  9.75 (1H, s, CHO), 7.26-7.16 (4H, m, ArH), 6.73 (2H, d, *J* = 8.2 Hz, ArH), 6.58 (1H, d, *J* = 9.2 Hz, NH), 6.51 (2H, d, *J* = 8.5 Hz, ArH), 5.76-5.73 (1H, m, NH), 4.32 (1H, d, *J* = 11.4 Hz, ArCH), 4.05 (2H, q, *J* = 7.1 Hz,  $CH_2CH_3$ ), 3.88 (1H, m,  $CHCHO$ ), 3.75 (3H, s,  $OCH_3$ ), 3.76 (1H, br,  $CHCO_2Et$ ), 2.38 (3H, s,  $ArCH_3$ ), 1.39 (9H, s,  $C(CH_3)_3$ ), 1.13 (3H, t, *J* = 7.1 Hz,  $CH_2CH_3$ );  $^{13}C$  NMR (100 MHz,  $CDCl_3$ )  $\delta$  201.0, 172.5, 155.2, 153.9, 140.9, 137.5, 136.1, 129.8, 126.1, 117.5, 114.6, 80.0, 61.6, 58.6, 56.4, 55.6, 52.4, 28.3, 21.1, 14.0; IR (neat) 3363, 2978, 1714, 1512, 1244, 1167, 1030, 741  $cm^{-1}$ ; HRMS (ESI-TOF) Calcd. for  $C_{26}H_{34}N_2NaO_6$ : 493.2309 ( $[M + Na]^+$ ), Found: 493.2307 ( $[M + Na]^+$ ); HPLC analysis: Daicel Chiralpak AD-H, hexane/*i*-PrOH = 9/1, flow rate = 0.5 mL/min, retention time; 36.8 min and 45.4 min (major).

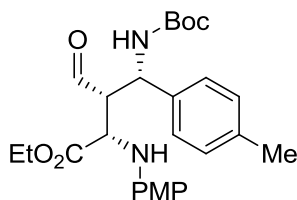

**Ethyl (2*S*,3*R*,4*S*)-4-((*tert*-Butoxycarbonyl)amino)-3-formyl-2-((4-methoxyphenyl)amino)-4-(*o*-tolyl)butanoate (Table 2, entry 4):**  $[\alpha]_D^{24} = 29.7$  (*c* 0.8,  $CHCl_3$ , 99% ee),  $^1H$  NMR (400 MHz,  $CDCl_3$ )  $\delta$  9.74 (1H, s, CHO), 7.38-7.12 (4H, m, ArH), 6.80-6.76 (2H, m, ArH), 6.69 (1H, d, *J* = 9.2 Hz, NH), 6.63

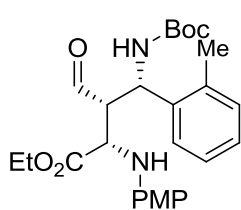

(2H, d,  $J = 8.9$  Hz, ArH), 5.91-5.88 (1H, m, NH), 4.43 (1H, d,  $J = 11.6$  Hz, ArCH), 4.04 (2H, q,  $J = 7.1$  Hz,  $\text{CH}_2\text{CH}_3$ ), 3.87 (1H, app d,  $J = 9.9$  Hz,  $\text{CHCHO}$ ), 3.76 (3H, s,  $\text{OCH}_3$ ), 3.61 (1H, br,  $\text{CHCO}_2\text{Et}$ ), 2.52 (3H, s,  $\text{ArCH}_3$ ), 1.38 (9H, s,  $\text{C}(\text{CH}_3)_3$ ), 1.11 (3H, t,  $J = 7.1$  Hz,  $\text{CH}_2\text{CH}_3$ );  $^{13}\text{C}$  NMR (100 MHz,  $\text{CDCl}_3$ )  $\delta$  200.7, 172.5, 155.1, 153.8, 140.8, 137.5, 134.6, 131.3, 127.9, 126.5, 126.2, 117.1, 114.6, 80.0, 61.6, 56.3, 55.9, 55.6, 49.9, 28.3, 19.2, 13.9; IR (neat) 3365, 2978, 1717, 1513, 1368, 1242, 1165, 1036  $\text{cm}^{-1}$ ; HRMS (ESI-TOF) Calcd. for  $\text{C}_{26}\text{H}_{34}\text{N}_2\text{NaO}_6$ : 493.2309 ( $[\text{M} + \text{Na}]^+$ ), Found: 493.2307 ( $[\text{M} + \text{Na}]^+$ ); HPLC analysis: Daicel Chiralpak AD-H, hexane/*i*-PrOH = 9/1, flow rate = 0.5 mL/min, retention time; 32.7 min and 35.1 min (major).

**Ethyl (2S,3R,4S)-4-((tert-Butoxycarbonyl)amino)-4-(4-chlorophenyl)-3-formyl-2-((4-methoxyphenyl)amino)butanoate (Table 2, entry 5):**

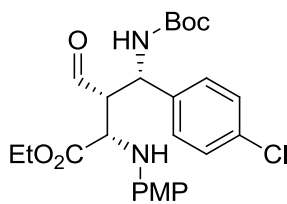

$[\alpha]_D^{24} = 28.8$  ( $c$  1.0,  $\text{CHCl}_3$ , 98% ee),  $^1\text{H}$  NMR (400 MHz,  $\text{CDCl}_3$ )  $\delta$  9.75 (1H, s, CHO), 7.40 (2H, d,  $J = 8.7$  Hz, ArH), 7.29 (2H, d,  $J = 8.2$  Hz, ArH), 6.75 (2H, d,  $J = 8.7$  Hz, ArH), 6.66 (1H, d,  $J = 8.9$  Hz, NH), 6.51 (2H, d,  $J = 8.7$  Hz, ArH), 5.77-5.73 (1H, m, NH), 4.34 (1H, d,  $J = 11.6$  Hz, ArCH), 4.06 (2H, q,  $J = 7.1$  Hz,  $\text{CH}_2\text{CH}_3$ ), 3.85-3.78 (1H, m,  $\text{CHCHO}$ ), 3.75 (3H, s,  $\text{OCH}_3$ ), 3.66 (1H, m,  $\text{CHCO}_2\text{Et}$ ), 1.39 (9H, s,  $\text{C}(\text{CH}_3)_3$ ), 1.14 (3H, t,  $J = 7.1$  Hz,  $\text{CH}_2\text{CH}_3$ );  $^{13}\text{C}$  NMR (100 MHz,  $\text{CDCl}_3$ )  $\delta$  200.4, 172.2, 155.1, 154.0, 140.6, 137.9, 133.8, 129.3, 127.6, 117.4, 114.7, 80.3, 61.7, 58.2, 56.2, 55.6, 52.2, 28.3, 14.0; IR (neat) 3362, 2978, 1713, 1512, 1491, 1241, 1165, 1028  $\text{cm}^{-1}$ ; HRMS (ESI-TOF) Calcd. for  $\text{C}_{25}\text{H}_{31}\text{ClN}_2\text{NaO}_6$ : 513.1763 ( $[\text{M} + \text{Na}]^+$ ), Found: 513.1758 ( $[\text{M} + \text{Na}]^+$ ); HPLC analysis: Daicel Chiralpak AD-H, hexane/*i*-PrOH = 9/1, flow rate = 0.5 mL/min, retention time; 48.1 min and 60.1 min (major).

**Ethyl (2S,3R,4S)-4-((tert-Butoxycarbonyl)amino)-3-formyl-2-((4-methoxyphenyl)amino)-4-(naphthalen-2-yl)butanoate (Table 2, entry 6):**

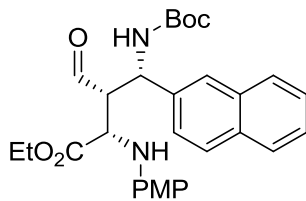

$[\alpha]_D^{24} = 49.5$  ( $c$  0.62,  $\text{CHCl}_3$ , 99% ee),  $^1\text{H}$  NMR (400 MHz,  $\text{CDCl}_3$ )  $\delta$  9.82 (1H, s, CHO), 7.91 (1H, d,  $J = 8.5$  Hz, ArH), 7.87 (1H, dd,  $J = 5.9, 3.7$  Hz, ArH), 7.81-7.78 (2H, m, ArH), 7.52 (2H, dd,  $J = 6.2, 3.3$  Hz, ArH), 7.47 (1H, dd,  $J = 8.6, 1.6$  Hz, ArH), 6.79 (1H, d,  $J = 8.9$  Hz, NH), 6.67 (2H, d,  $J = 8.7$  Hz, ArH), 6.48 (2H, d,  $J = 8.9$  Hz, ArH), 5.97-5.93 (1H, m, NH), 4.38 (1H, d,  $J = 11.4$  Hz, ArCH), 4.03 (2H, q,  $J = 7.3$  Hz,  $\text{CH}_2\text{CH}_3$ ), 3.85-3.79 (2H, m,  $\text{CHCHO}$ ,  $\text{CHCO}_2\text{Et}$ ), 3.72 (3H, s,  $\text{OCH}_3$ ), 1.41 (9H, s,  $\text{C}(\text{CH}_3)_3$ ), 1.11 (3H, t,  $J = 7.0$  Hz,  $\text{CH}_2\text{CH}_3$ );  $^{13}\text{C}$  NMR (100 MHz,  $\text{CDCl}_3$ )  $\delta$  200.7, 172.4, 155.3, 153.9, 140.8, 136.6, 133.4, 132.9, 129.2, 128.0, 127.7, 126.7, 126.3, 125.3, 124.0, 117.4, 114.6, 80.2, 61.6, 58.4, 56.4, 55.6,

52.9, 28.3, 14.0; IR (neat) 3361, 2978, 1715, 1512, 1242, 1165, 1030, 735  $\text{cm}^{-1}$ ; HRMS (ESI-TOF) Calcd. for  $\text{C}_{29}\text{H}_{34}\text{N}_2\text{NaO}_6$ : 529.2309 ( $[\text{M} + \text{Na}]^+$ ), Found: 523.2305 ( $[\text{M} + \text{Na}]^+$ ); HPLC analysis: Daicel Chiralpak AD-H, hexane/*i*-PrOH = 9/1, flow rate = 0.5 mL/min, retention time; 52.3 min and 65.0 min (major).

**Table S1** Effects of additive in the Asymmetric Aminoxylation of **7** Catalyzed by (*S*)-**1**<sup>a</sup>

| Entry | Additive                           | Yield (%) <sup>b</sup> |
|-------|------------------------------------|------------------------|
| 1     | none                               | 27                     |
| 2     | PhCHO (1 equiv)                    | 33                     |
| 3     | PhCHO (5 equiv)                    | 47                     |
| 4     | $\text{CCl}_3\text{CHO}$ (5 equiv) | n.r.                   |

<sup>a</sup> The reaction of aldehyde **7** (0.1 mmol) with 1-methyl-2-nitrosobenzene (0.1 mmol) was carried out in the presence of (*S*)-**1** (0.005 mmol) and an additive in  $\text{CHCl}_3$  (50~100  $\mu\text{L}$ ) at 0 °C for 2 h. <sup>b</sup> Isolated yield after reduction with  $\text{NaBH}_4$ .

**General Procedure for the Asymmetric One-pot Mannich Reaction-Aminoxylation Catalyzed by (*S*)-**1**:** To a solution of *N*-protected imine (0.125 mmol) in acetaldehyde (250  $\mu\text{L}$ ) was added a chiral amino sulfonamide (*S*)-**1** (2.7 mg, 0.00625 mmol) at 0 °C. After stirring for 3 h, the reaction mixture was evaporated and vacuumed. The residue was dissolved in  $\text{CHCl}_3$  (62.5  $\mu\text{L}$ ). To the mixture were added (*S*)-**1** (2.7 mg, 0.0625 mmol), 1-methyl-2-nitrosobenzene (15.1 mg, 0.125 mmol) and benzaldehyde (62.5  $\mu\text{L}$ , 0.625 mmol) at 0 °C. The mixture was stirred for 2 h. To the reaction mixture was then added MeOH (1.0 mL) and  $\text{NaBH}_4$  (14 mg, 0.375 mmol) at 0 °C. After 30 min of stirring at 0 °C, the reaction mixture was quenched with 1N HCl and extracted with ethyl acetate. The combined organic layer was washed with brine, dried over  $\text{Na}_2\text{SO}_4$  and concentrated. The residue was purified by flash column chromatography on silica gel to afford corresponding product.

***tert*-Butyl ((1*R*,2*S*)-3-Hydroxy-1-(4-methoxyphenyl)-2-((*o*-tolylamino)oxy)propyl)carbamate (**8a**):**  $[\alpha]_{\text{D}}^{24} = -28.3$  (*c* 1.2,  $\text{CHCl}_3$ , 99% ee), <sup>1</sup>H NMR (400 MHz,  $\text{CDCl}_3$ )  $\delta$  7.52 (1H, br, ONH), 7.29-7.26 (2H, m, ArH), 7.11 (1H, t, *J* = 7.6 Hz, ArH), 7.04 (2H, t, *J* = 8.0 Hz, ArH), 6.91-6.86 (3H, m, ArH), 5.26 (1H, br, NH), 5.15 (1H, br, ArCH), 4.05 (1H, dd, *J* = 11.0, 5.0 Hz,  $\text{CHONH}$ ), 3.87-3.71 (5H, m,  $\text{OCH}_3$ ,  $\text{CH}_2\text{OH}$ ), 3.17 (1H, br, OH), 2.10 (3H, s,  $\text{ArCH}_3$ ), 1.43 (9H, s,  $\text{C}(\text{CH}_3)_3$ ); <sup>13</sup>C NMR (100 MHz,  $\text{CDCl}_3$ )

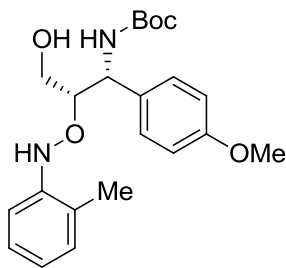

$\delta$  159.2, 156.4, 145.9, 131.3, 130.1, 128.0, 126.8, 123.5, 122.0, 114.5, 114.2, 85.7, 80.1, 62.5, 55.3, 53.5, 28.3, 16.8; IR (neat) 3414, 2976, 1694, 1512, 1248, 1169, 1036, 762  $\text{cm}^{-1}$ ; HRMS (ESI-TOF) Calcd. for  $\text{C}_{22}\text{H}_{30}\text{N}_2\text{NaO}_5$ : 425.2047 ( $[\text{M} + \text{Na}]^+$ ), Found: 425.2047 ( $[\text{M} + \text{Na}]^+$ ); HPLC analysis: Daicel Chiralpak AD-H, hexane/*i*-PrOH = 4/1, flow rate = 0.5 mL/min, retention time; 28.4 min (major) and 31.1 min.

**Benzyl ((1*R*,2*S*)-3-Hydroxy-1-phenyl-2-((*o*-tolylamino)oxy)propyl)carbamate (8b):**  $[\alpha]_{\text{D}}^{24} = -21.0$

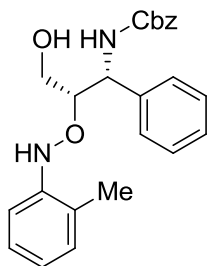

(*c* 0.9,  $\text{CHCl}_3$ , 99% ee),  $^1\text{H}$  NMR (400 MHz,  $\text{CDCl}_3$ )  $\delta$  7.43 (1H, br,  $\text{NHCH}$ ), 7.40-7.25 (10H, m, ArH), 7.10-6.98 (3H, m, ArH), 6.88 (1H, t,  $J = 7.4$  Hz, ArH), 5.58 (1H, br, NH), 5.25 (1H, br, ArCH), 5.14-5.07 (2H, m,  $\text{CO}_2\text{CH}_2\text{C}_6\text{H}_5$ ), 4.13 (1H, dd,  $J = 11.2, 4.8$  Hz,  $\text{CHONH}$ ), 3.83-3.74 (2H, m,  $\text{CH}_2\text{OH}$ ), 2.96 (1H, br, OH), 2.07 (3H, s,  $\text{ArCH}_3$ );  $^{13}\text{C}$  NMR (100 MHz,  $\text{CDCl}_3$ )  $\delta$  156.9, 145.7, 138.9, 136.2, 130.2, 129.0, 128.6, 128.2, 128.1, 128.0, 126.90, 126.86, 123.6, 122.2, 114.5, 85.6, 67.2, 62.5, 54.9, 16.8; IR (neat) 3397, 2359, 1699, 1512, 1246, 1049, 741  $\text{cm}^{-1}$ ; HRMS (ESI-TOF) Calcd. for  $\text{C}_{24}\text{H}_{27}\text{N}_2\text{O}_4$ : 407.1965 ( $[\text{M} + \text{H}]^+$ ), Found: 407.1955 ( $[\text{M} + \text{H}]^+$ ); HPLC analysis: Daicel Chiralpak AD-H, hexane/*i*-PrOH = 4/1, flow rate = 0.5 mL/min, retention time; 40.7 min and 57.4 min (major).

## References

- (1) (a) T. Kano, Y. Yamaguchi, O. Tokuda and K. Maruoka, *J. Am. Chem. Soc.*, 2005, **127**, 16408.  
(b) T. Kano, Y. Yamaguchi and K. Maruoka, *Chem. Eur. J.*, 2009, **15**, 6678.
- (2) K. Juhl, N. Gathergood and K. A. Jørgensen, *Angew. Chem., Int. Ed.*, 2001, **40**, 2995.
- (3) (a) A. G. Wenzel and E. N. Jacobsen, *J. Am. Chem. Soc.*, 2002, **124**, 12964.  
(b) J. Song, Y. Wang and L. Deng, *J. Am. Chem. Soc.*, 2006, **128**, 6048.
- (4) A. L. Tillman, J. Ye and D. J. Dixon, *Chem. Commun.*, 2006, 1191.
- (5) C. Chandler, P. Galzerano, A. Michrowska and B. List, *Angew. Chem., Int. Ed.*, 2009, **48**, 1978.
- (6) T. Kano, Y. Yamaguchi and K. Maruoka, *Angew. Chem., Int. Ed.*, 2009, **48**, 1838.
- (7) J. W. Yang, C. Chandler, M. Stadler, D. Kampen and B. List, *Nature*, 2008, **452**, 453.

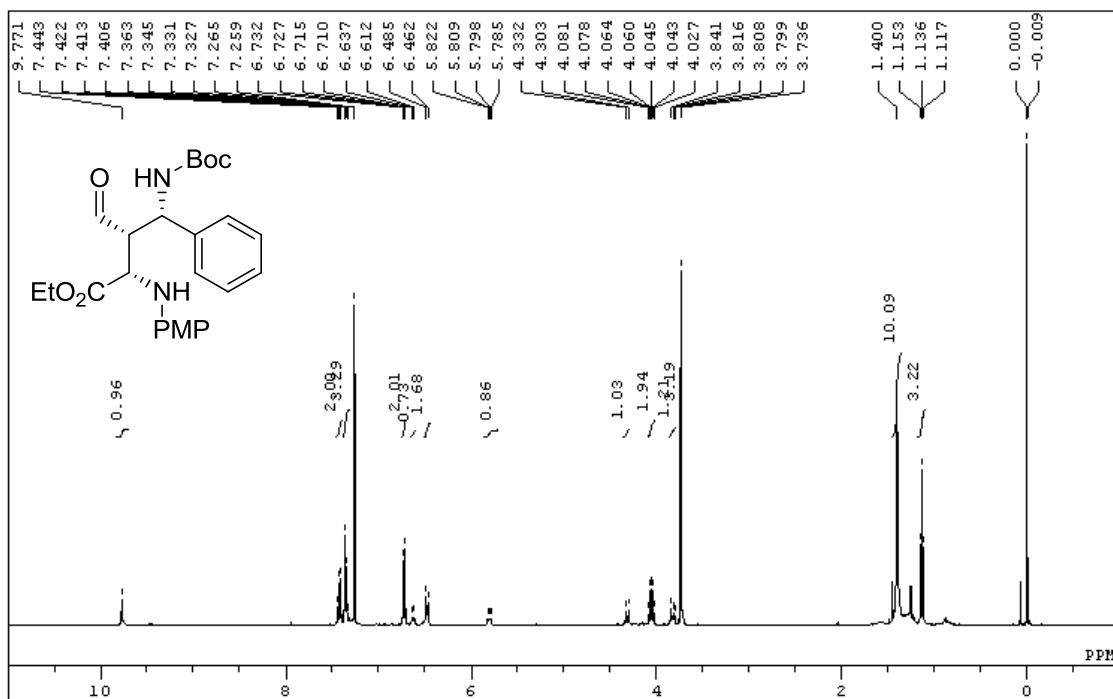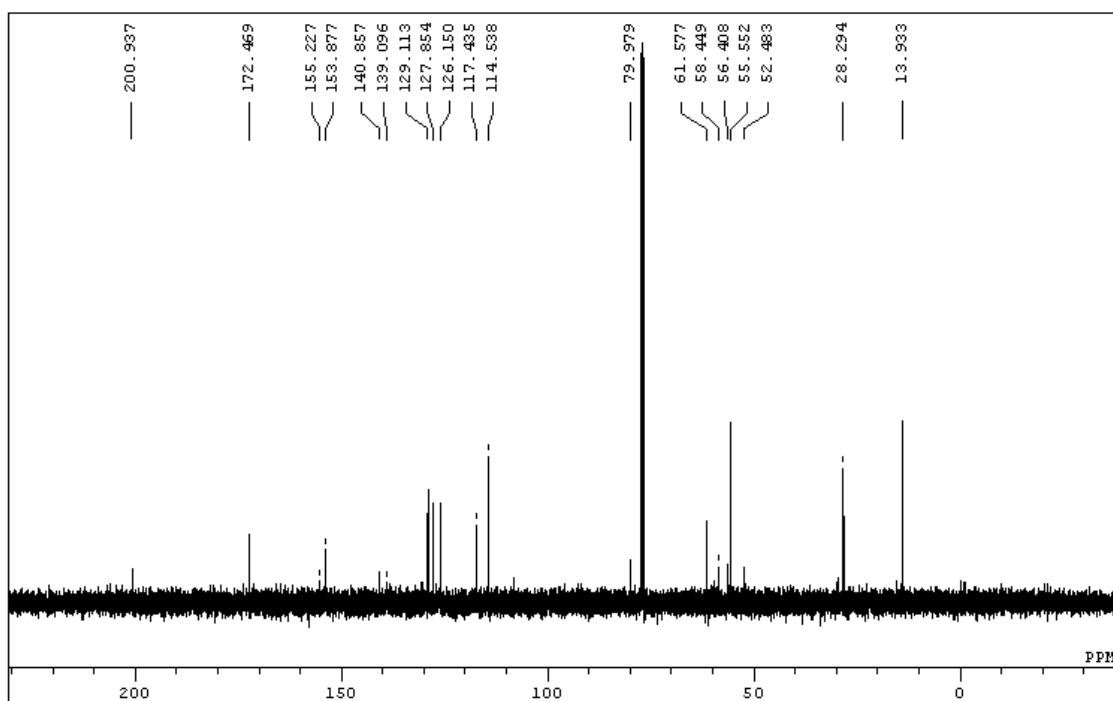

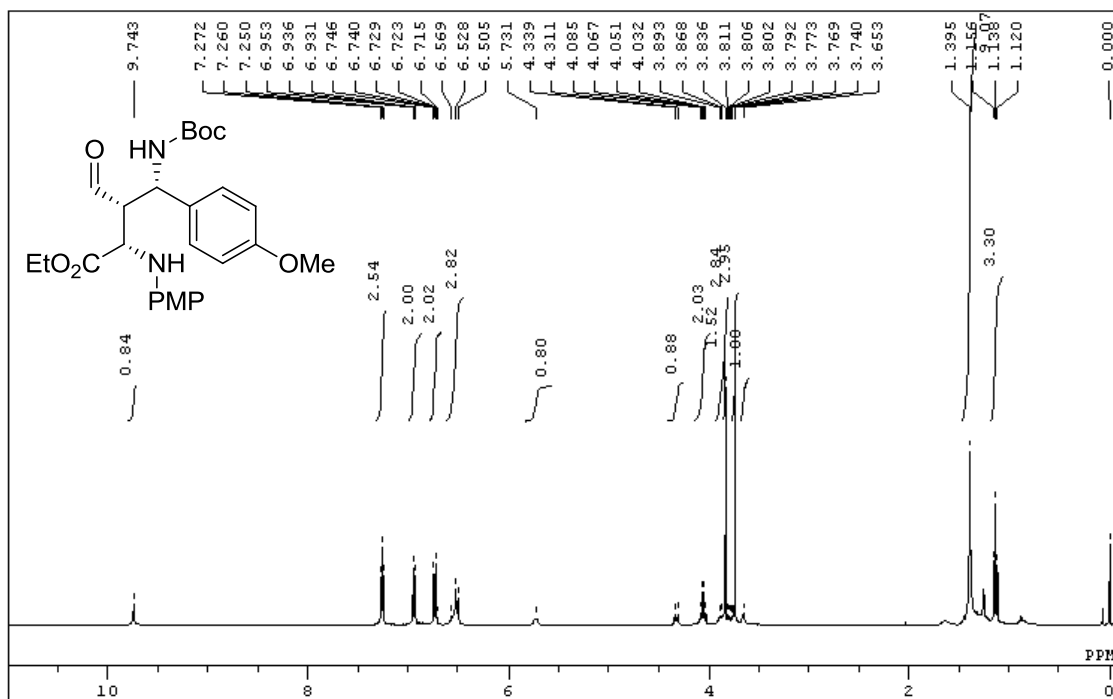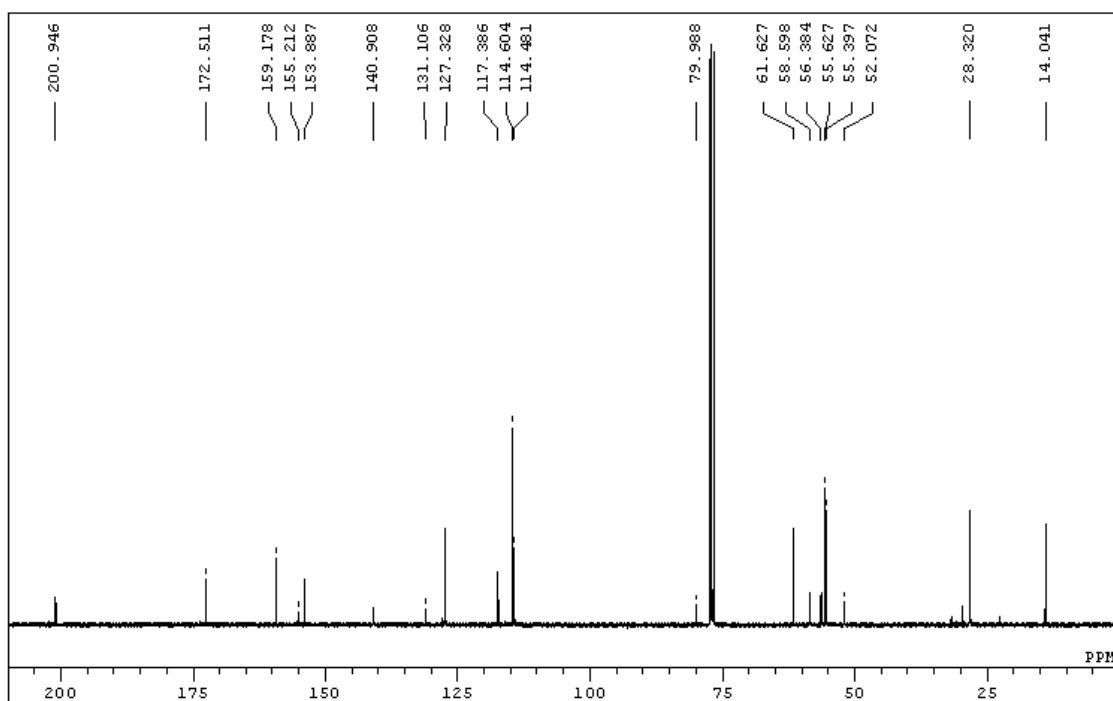



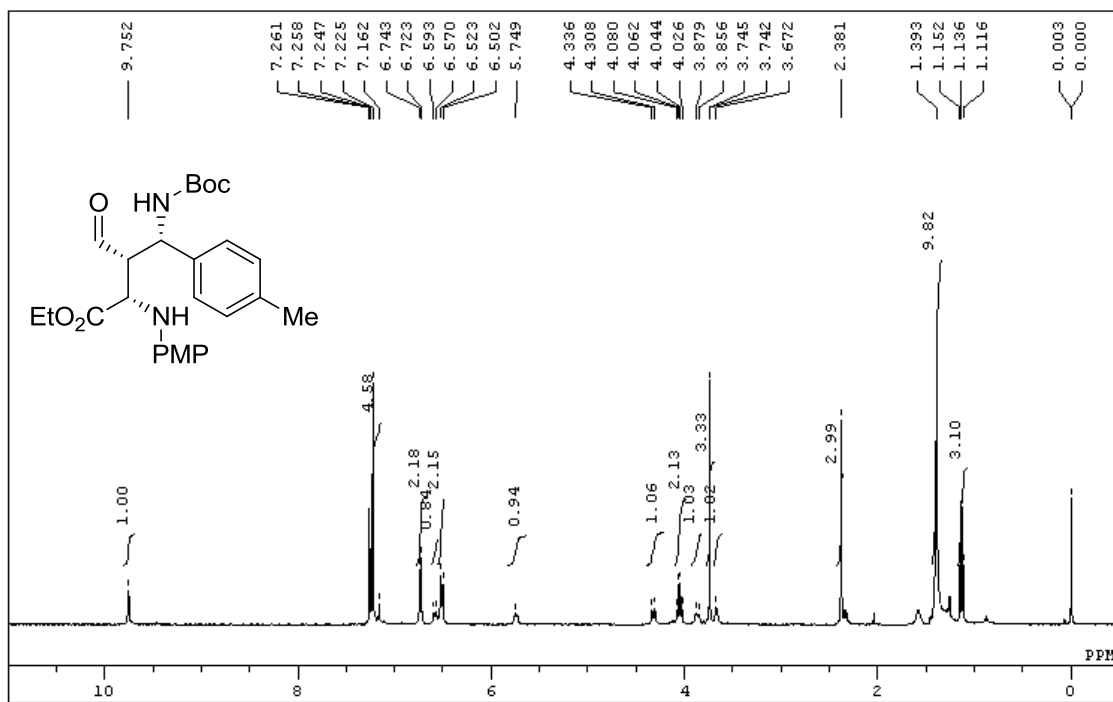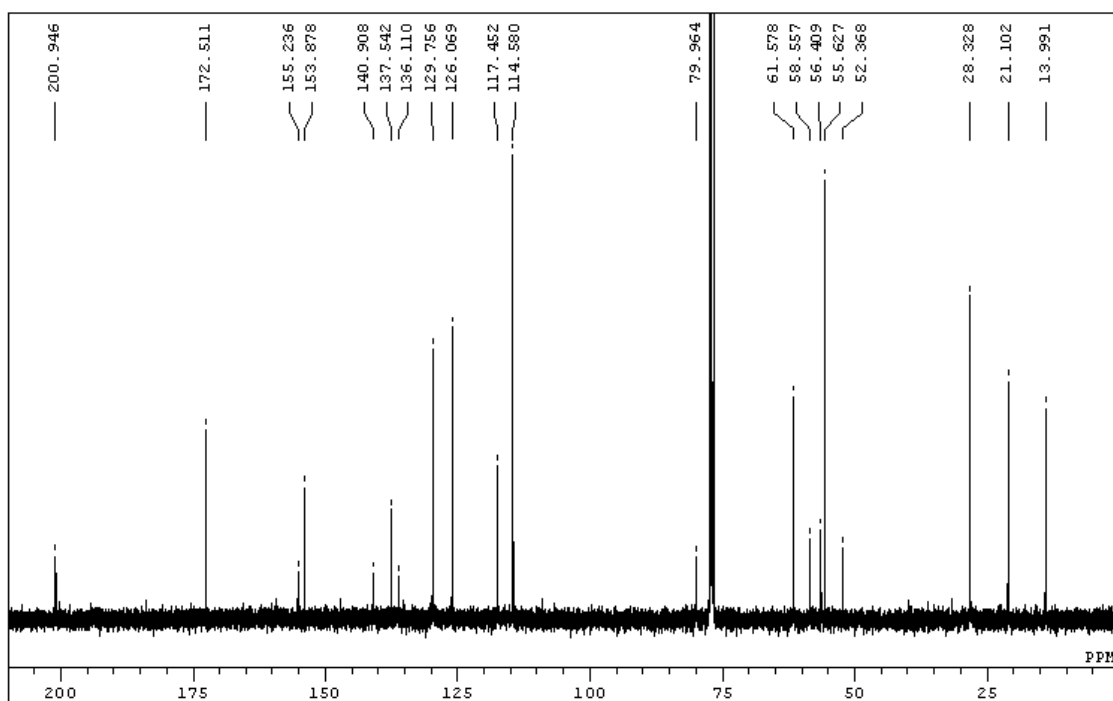

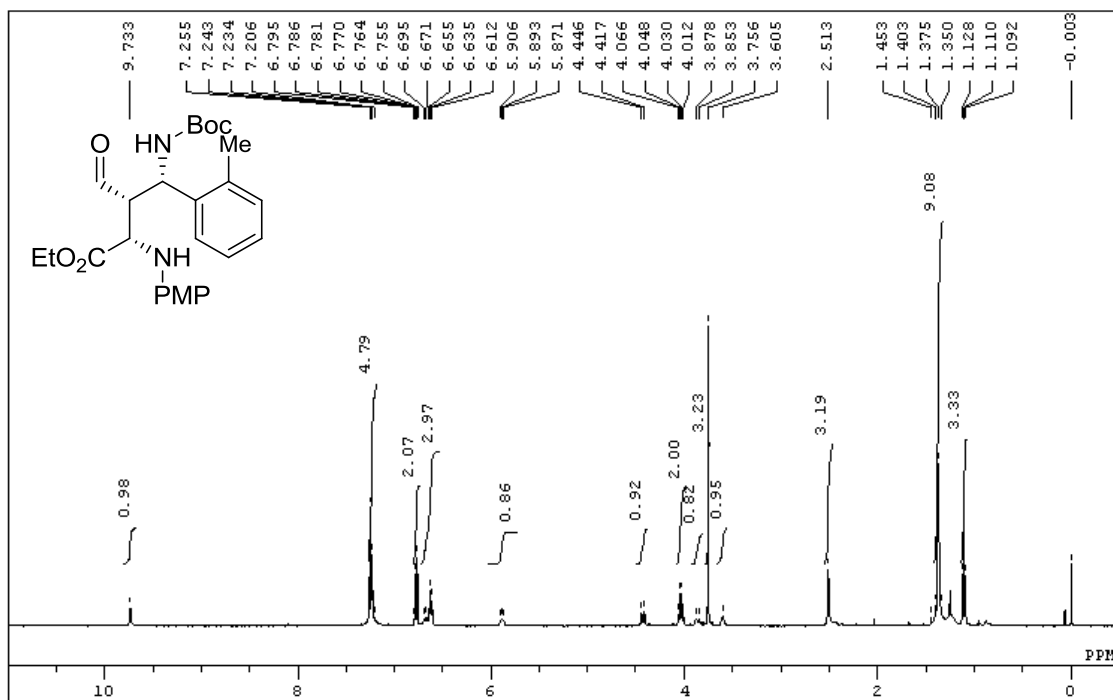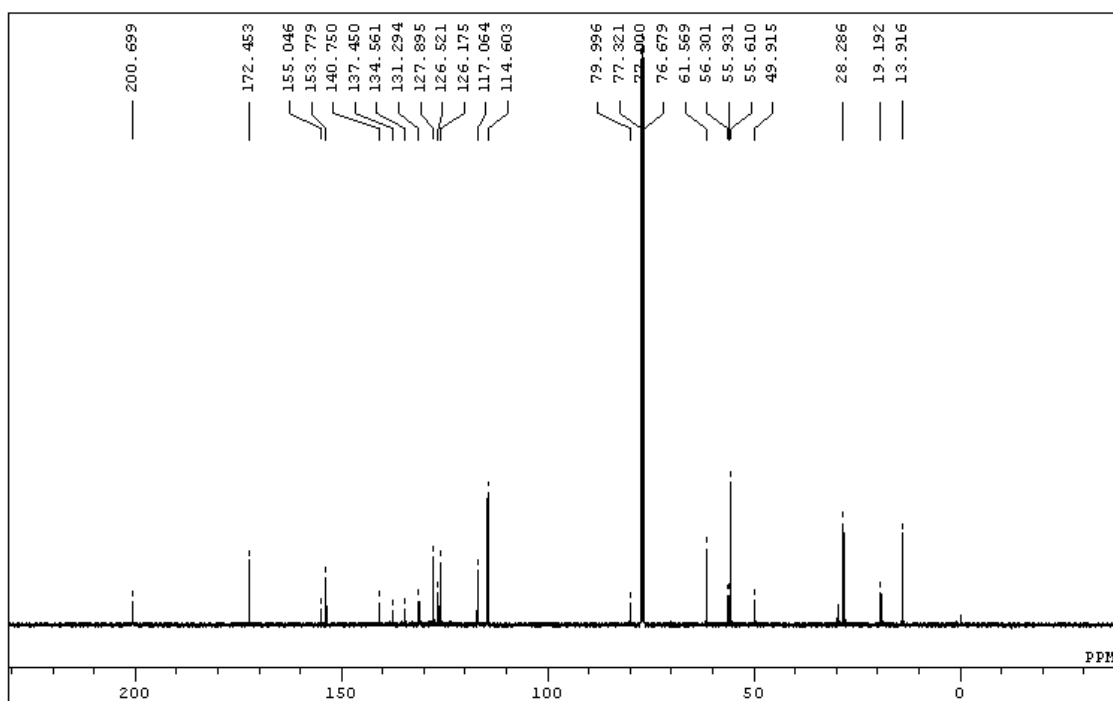

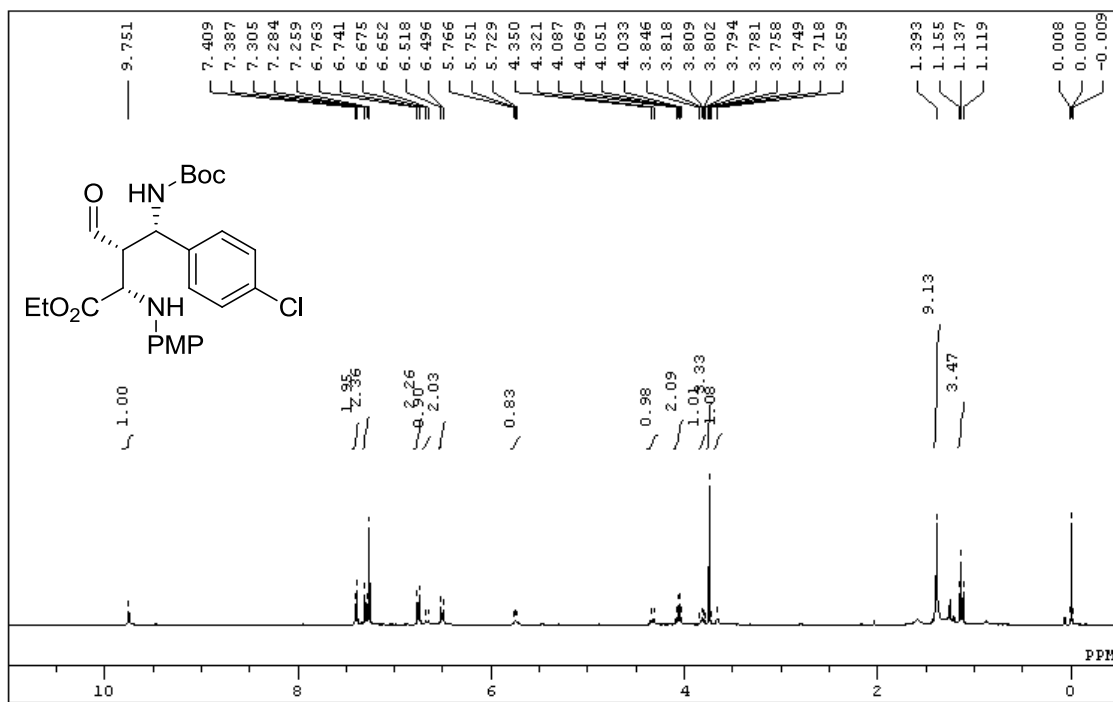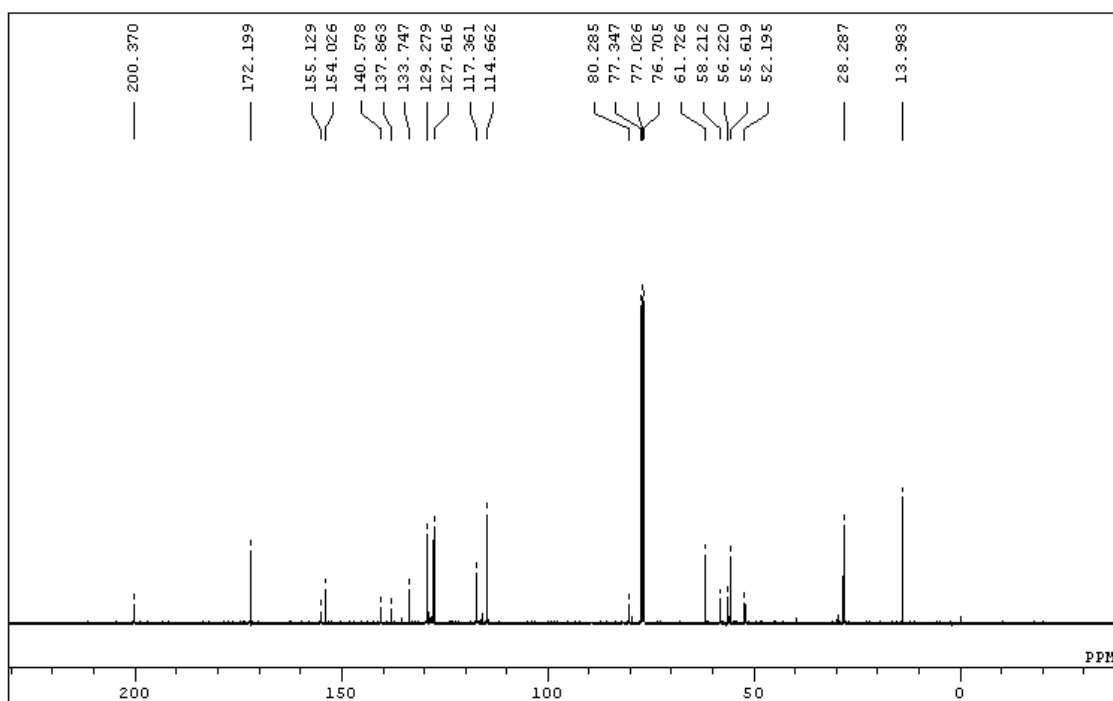

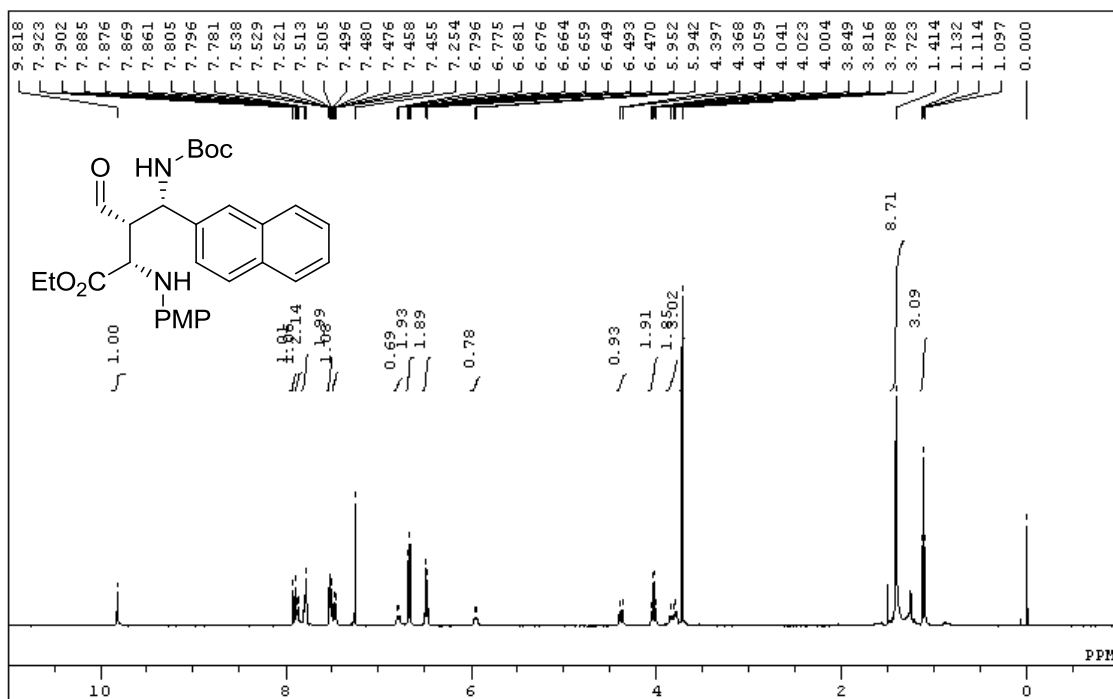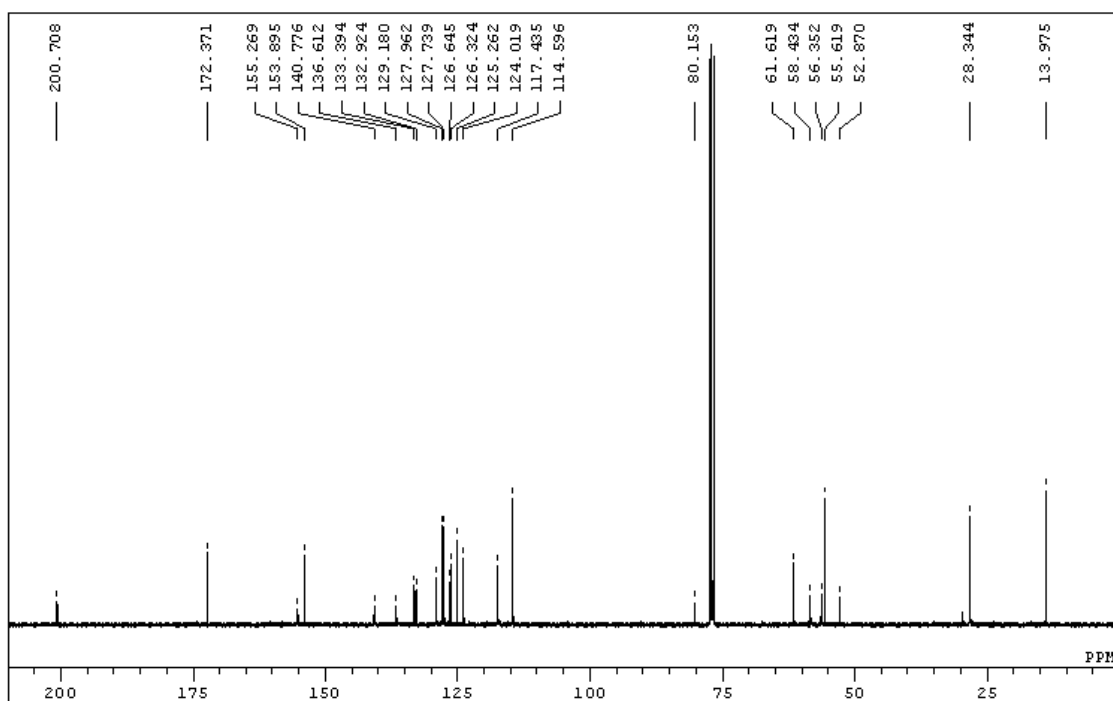

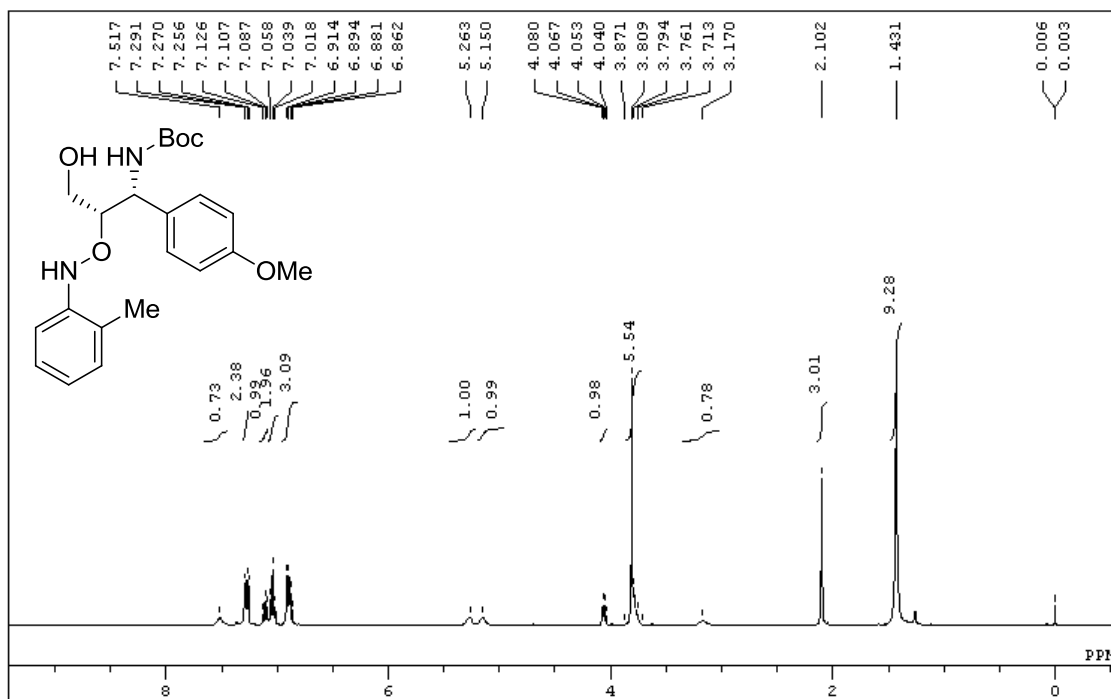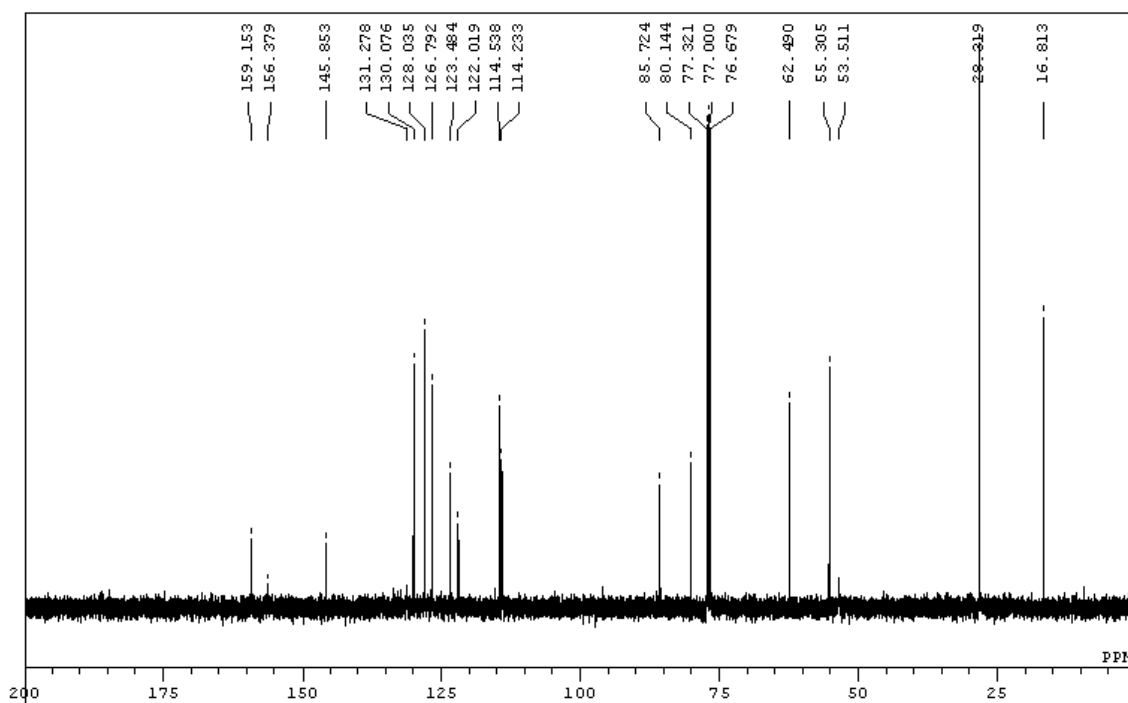

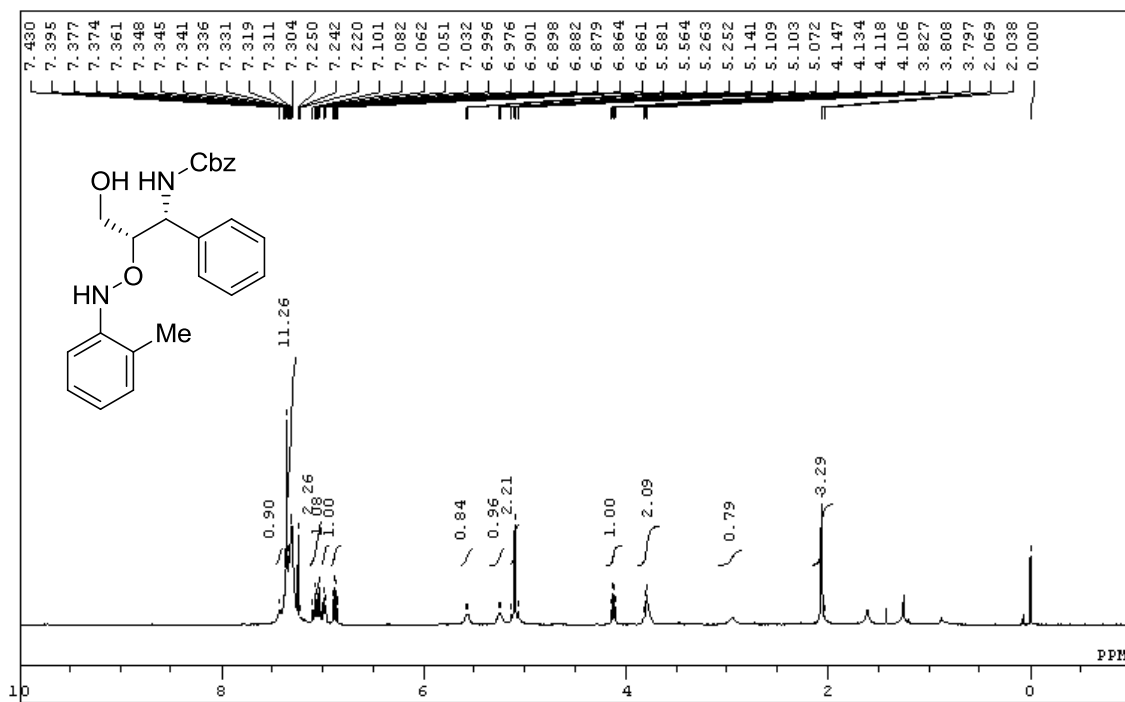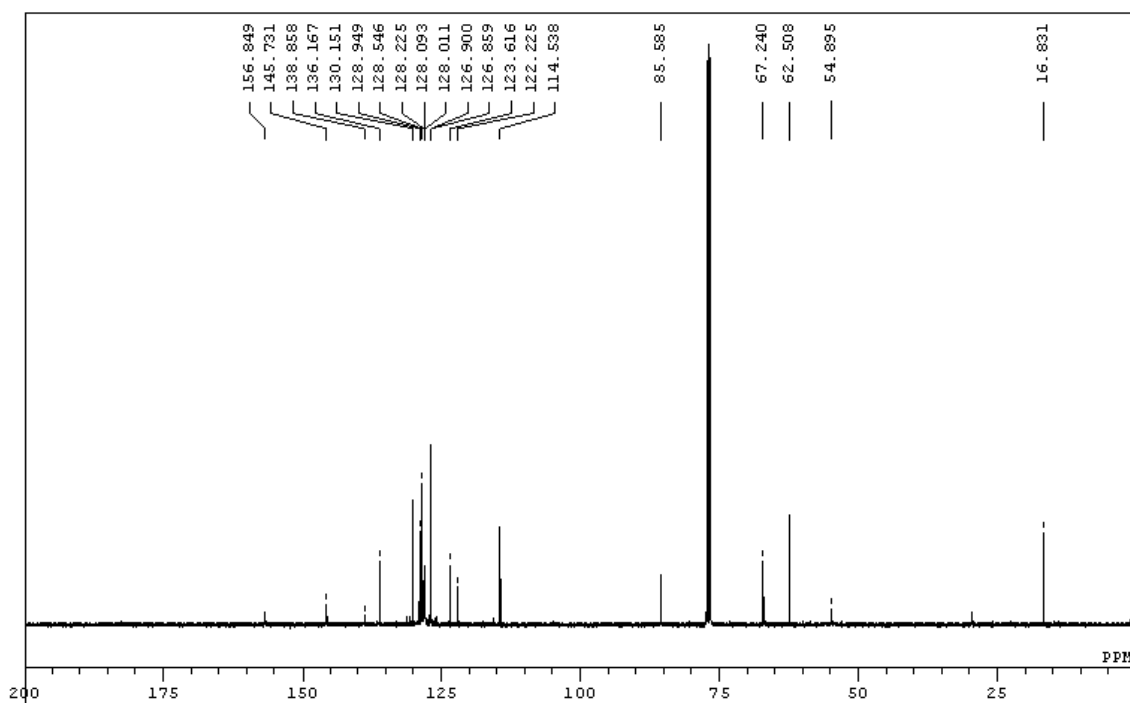

Supplement: c2cc38370e.pdf [file c2cc38370e.pdf]
